# Supplementary material for: Individualized Radiotherapy Timing for Postoperative Diffuse Low-Grade Glioma Patients: Managing Side Effects and Decisions
Source: Preprints.org preprint supplement (doi:10.20944/preprints202408.1011.v2), 2024-11-09
Supplement: Supplementary file 1 [file supplementary]

We conducted a literature search using electronic databases including the Cochrane Library, Ovid Medline, and Embase, with the search period ending in April 2024. The detailed search strategy is provided in Supplementary Table S1. The search included combinations of terms related to “glioma” and “radiotherapy,” restricted to English-language and human studies. We followed the PRISMA (Preferred Reporting Items for Systematic Reviews and Meta-Analyses) guidelines. Two authors (Xin and Wenbo) determined the eligibility of articles for inclusion and were responsible for reviewing the full text of all selected articles. The inclusion criteria were: (i) adult patients with World Health Organization (WHO) grade II gliomas confirmed histologically, (ii) patients who had received radiotherapy (fractionated local radiation, stereotactic radiotherapy, or brachytherapy), (iii) a sample size of ≥5, (iv) biopsy or surgical resection performed, (v) histological types of astrocytoma, oligodendroglioma, or mixed oligodendroglioma, and (vi) WHO grade 2. Preliminary exclusion criteria were: (i) reviews and (ii) abstracts not published in full text. Additionally, we applied the following exclusion criteria to the remaining articles: (i) patients who had previously received cranial radiotherapy and (ii) patients who underwent craniotomy in addition to biopsy or resection of DLGG. We searched the reference lists of the selected full-text articles to identify other studies. From the selected articles, we extracted the following data: study design, sample size, clinical characteristics of the study population, and final survival outcomes (median OS/PFS, 5-year overall survival rate, and progression-free survival rate). In this literature search, a total of 8197 unique records were obtained. We assessed 1506 articles to ascertain their eligibility for further screening, ultimately incorporating 5 studies that met the inclusion criteria (detailed screening process is illustrated in Figure 1).


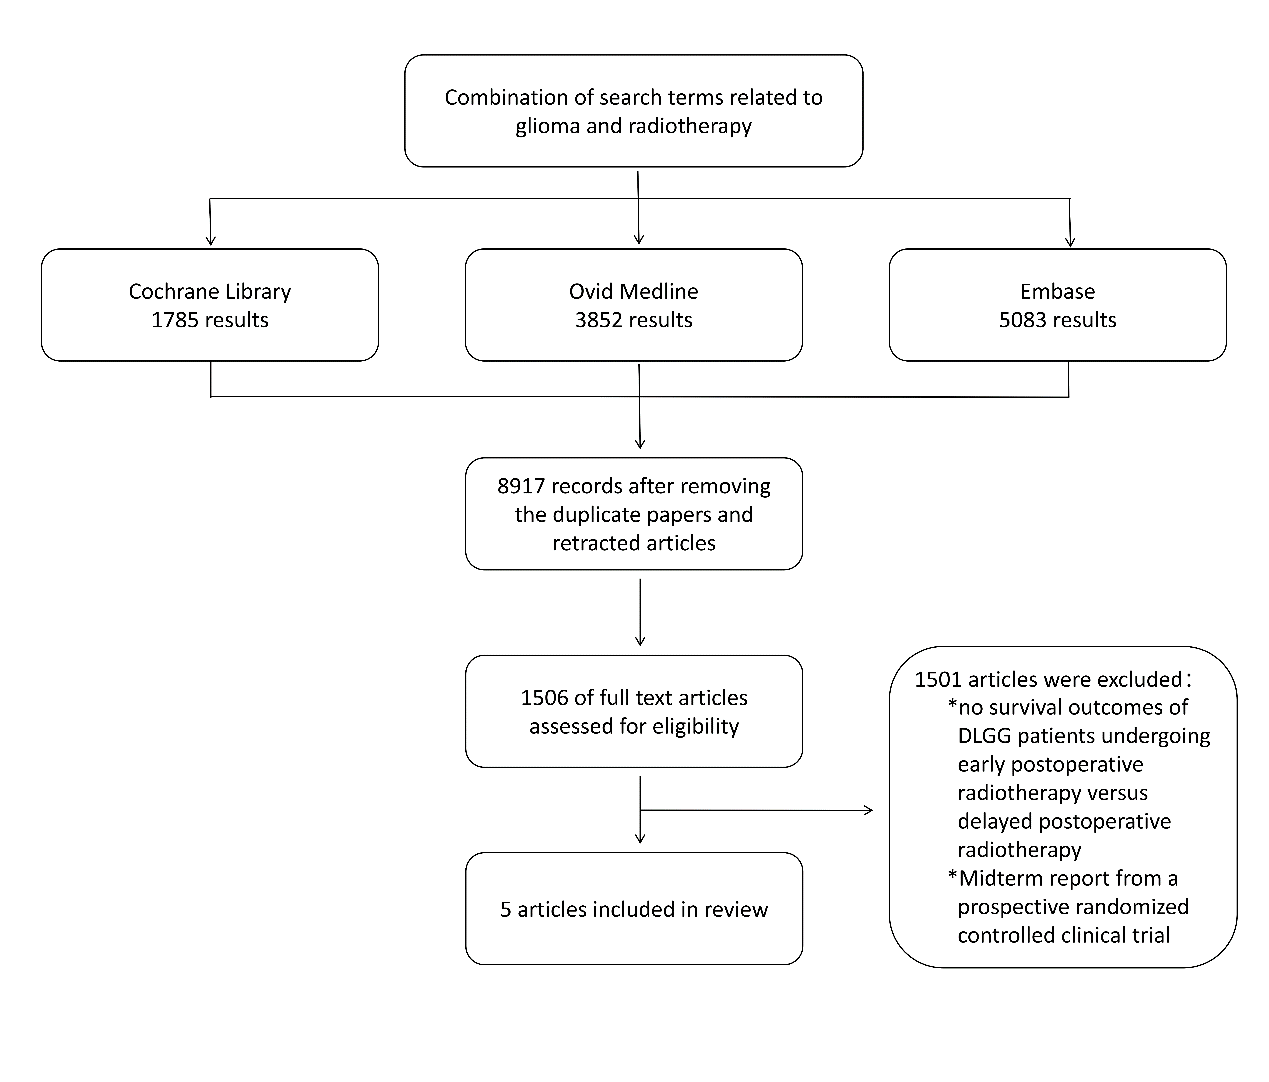


Supplementary S1. Identification of articles.
